# Supplementary material
Source: MDPI journal article supplement (https://www.mdpi.com/2075-163X/14/3/241)
Supplement: s1 [file s1]

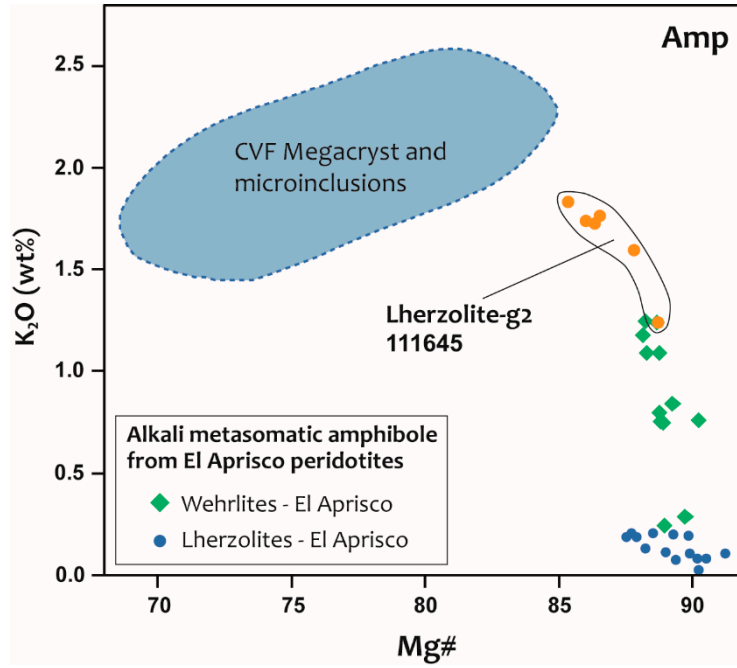

**Figure S1.** Mg# vs. K<sub>2</sub>O of amphibole from lherzolite-g2 111645 from the Cerro Pelado volcano (orange circles). Metasomatic amphibole from El Aprisco peridotites (Villaseca et al., 2019) and igneous amphibole from Calatrava volcanic megacrysts and cumulates (Villaseca et al., 2020a) have been included for comparison. Mg# =  $[Mg/(Mg + Fe^{2+})] \times 100$ , in mol.

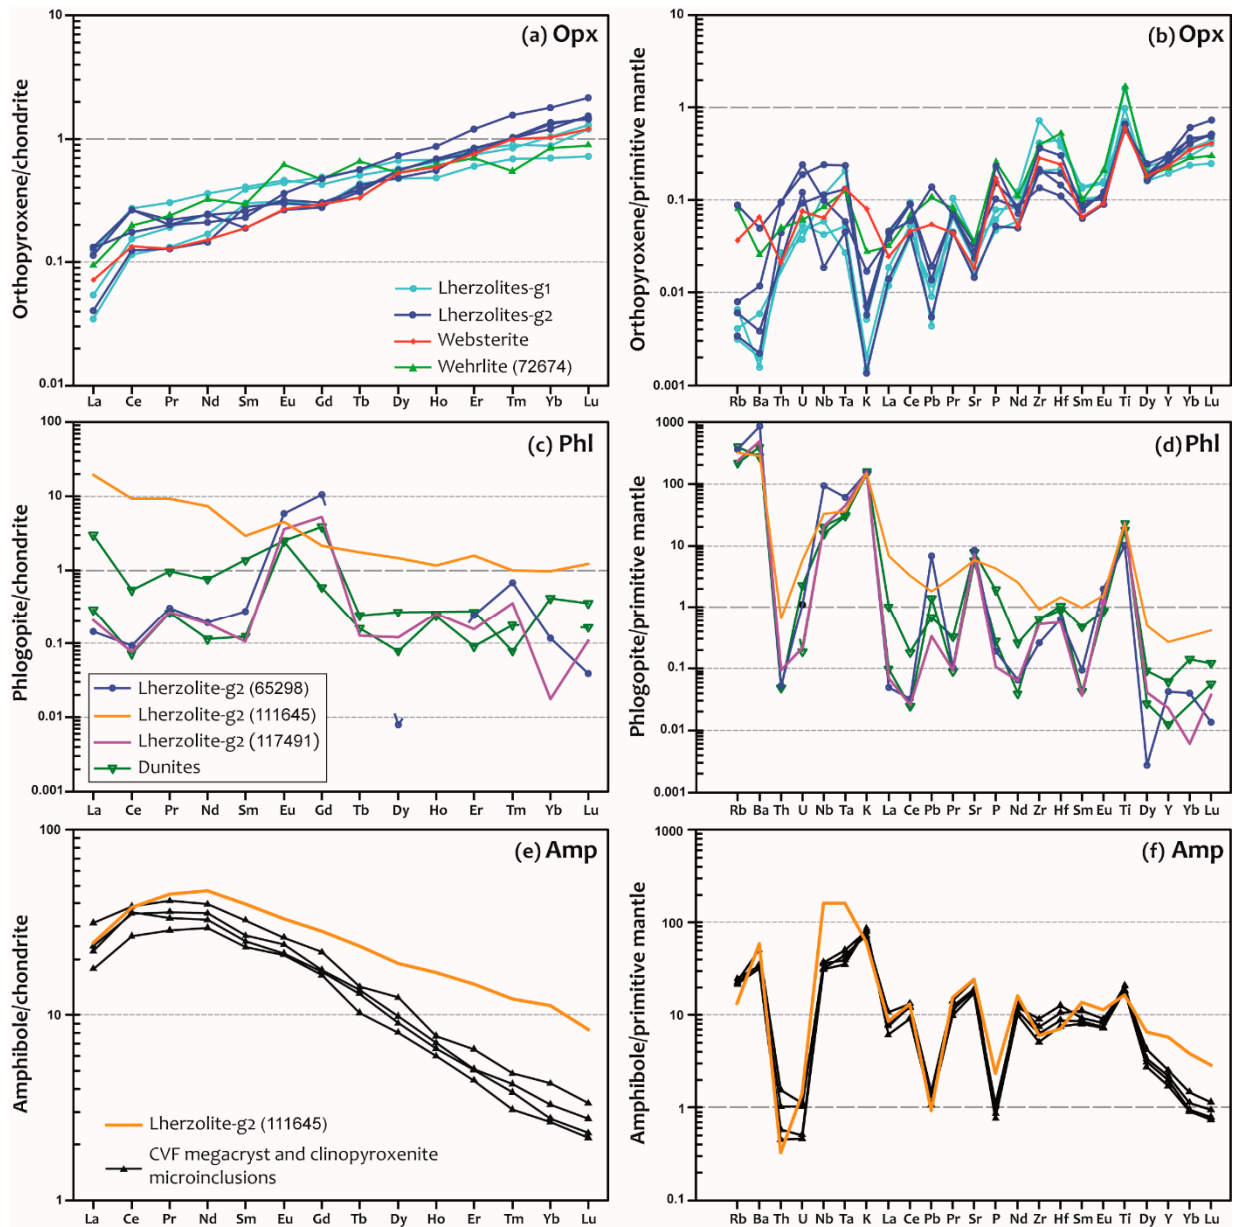

**Figure S2.** Chondrite-normalized REE and primordial mantle-normalized trace element diagrams for averaged values of orthopyroxene, (a, b), phlogopite (c, d) and amphibole (e, f) from the Cerro Pelado and El Palo peridotite xenoliths. Normalizing values from McDonough and Sun (1995). Igneous amphiboles from megacrysts and pyroxenitic cumulates of the CVF (e, f) (black patterns) (Villaseca et al., 2020a) have been included for comparison.

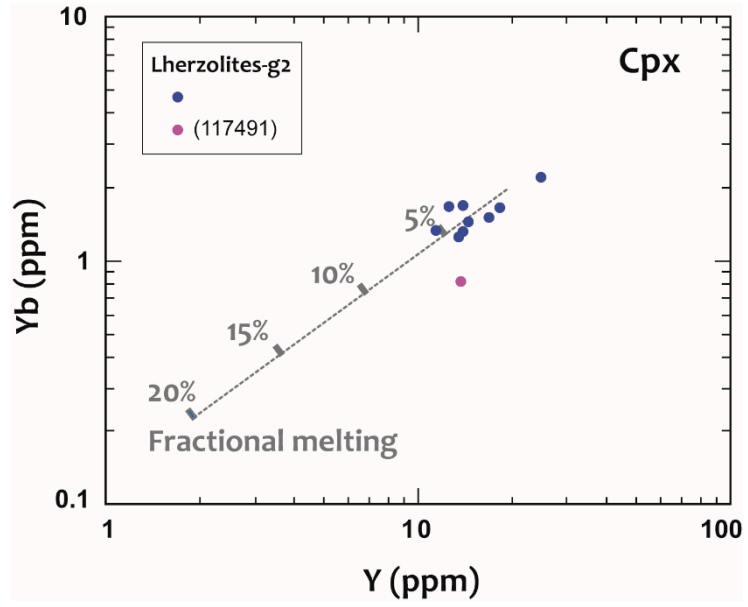

**Figure S3.** Partial melting results for Y and Yb in clinopyroxene from the Cerro Pelado and El Palo lherzolites-g2, following the method of Norman (1998).
